# Supplementary material for: A green process for separation and recovery of 5-hydroxymethylfurfural from carboxylic acid–choline chloride deep eutectic solvents
Source: Royal Society of Chemistry journal article supplement (doi:10.1039/d3nj01038d), 2023-01-01
Supplement: d3nj01038d1.pdf [file d3nj01038d1.pdf]

**Supplementary Information**  
for  
**Green process for separation and recovery of 5-  
hydroxymethylfurfural from carboxylic acid-choline chloride  
deep eutectic solvents**

**Table of contents**

|                                                                                   |     |
|-----------------------------------------------------------------------------------|-----|
| 1. Influences of different extraction conditions on the extraction of 5-HMF ..... | S2  |
| 2. Standard curves .....                                                          | S6  |
| 3. Relevant tables .....                                                          | S8  |
| 4. References .....                                                               | S12 |

# 1. Influences of different extraction conditions on the extraction of 5-HMF

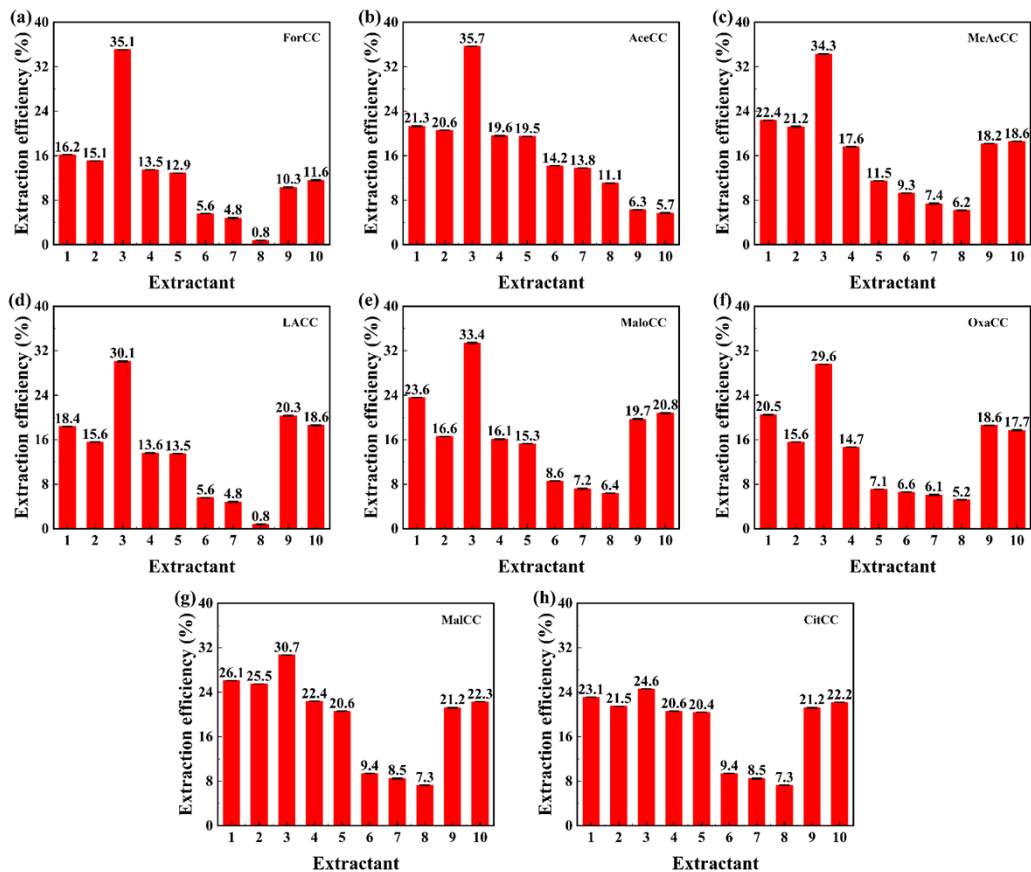

**Fig. S1** The extraction efficiencies of different organic solvents for the extraction of 5-HMF.

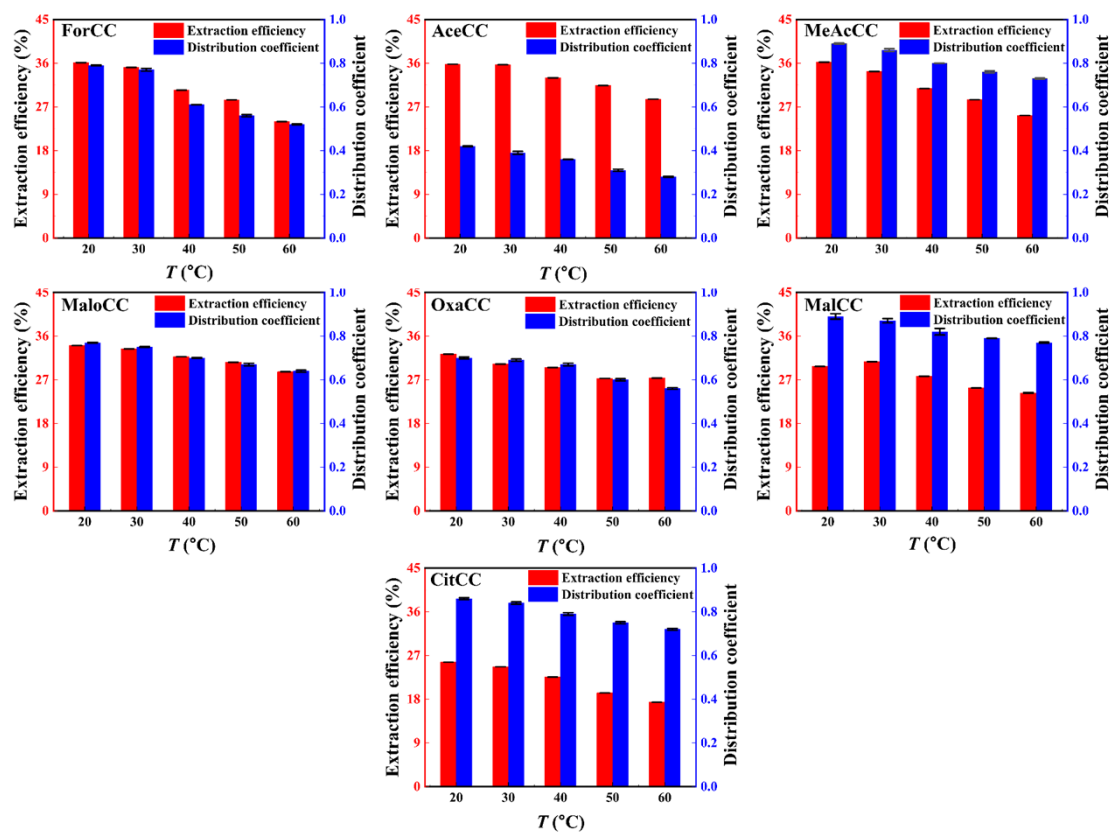

**Fig. S2** The effect of temperature on the extraction of 5-HMF by THF in different DESs.

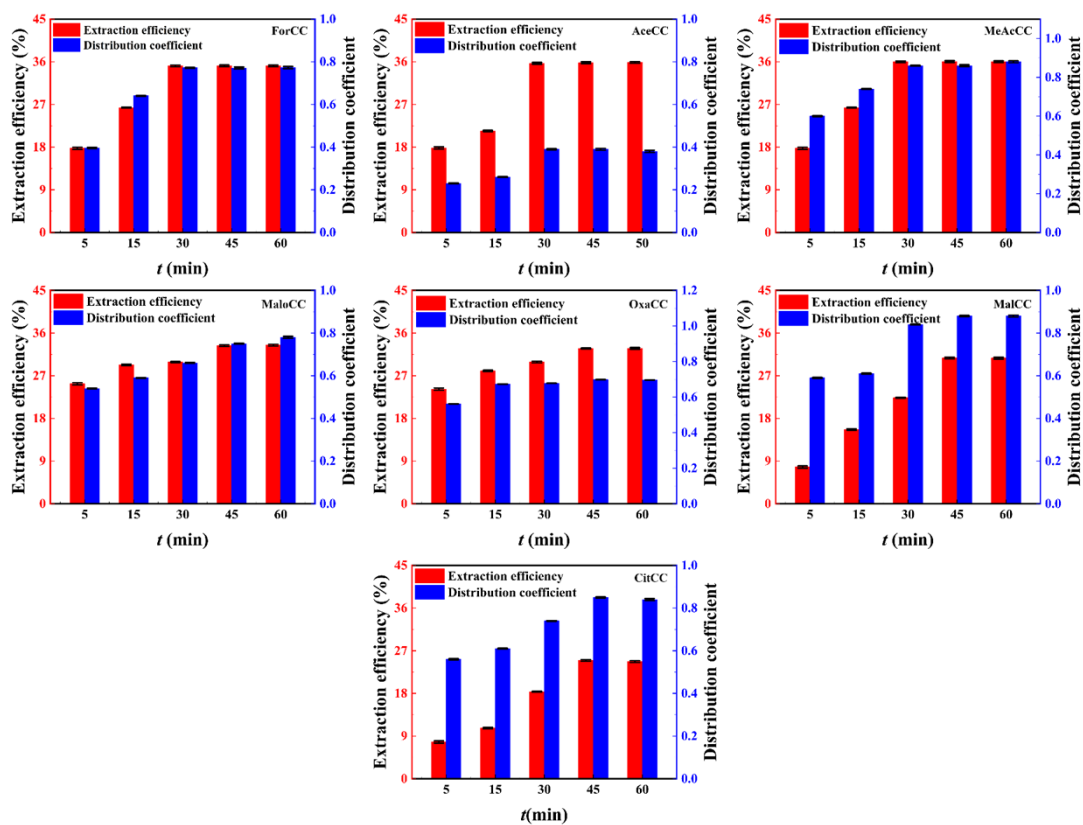

**Fig. S3** The effect of time on the extraction of 5-HMF by THF in different DESs.

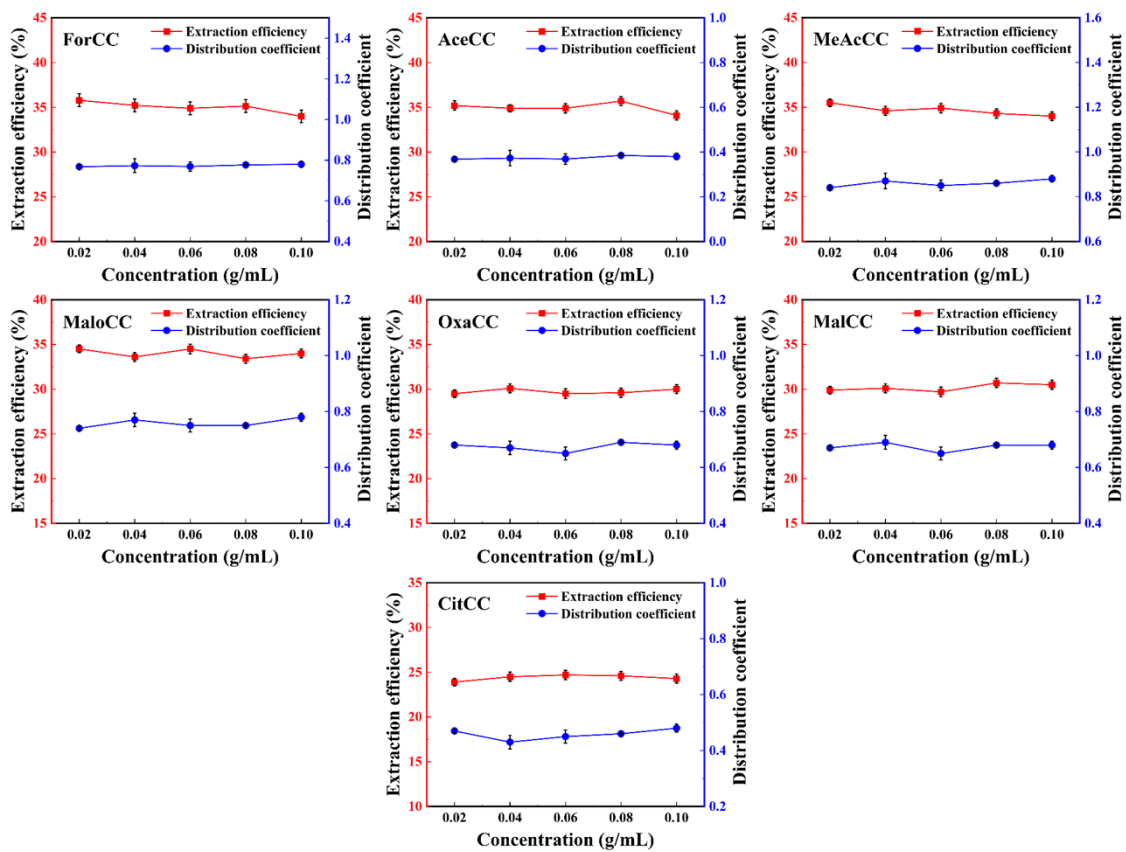

Fig. S4 The effect of concentration on the extraction of 5-HMF by THF in different DESs.

## 2. Standard curves

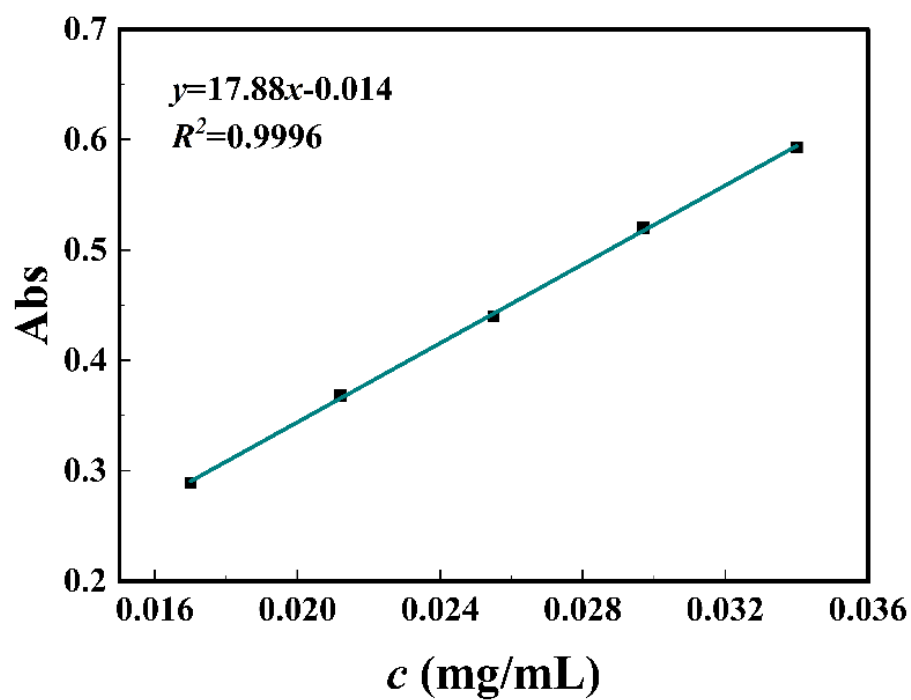

Fig. S5 The standard curve of D-fructose concentration.

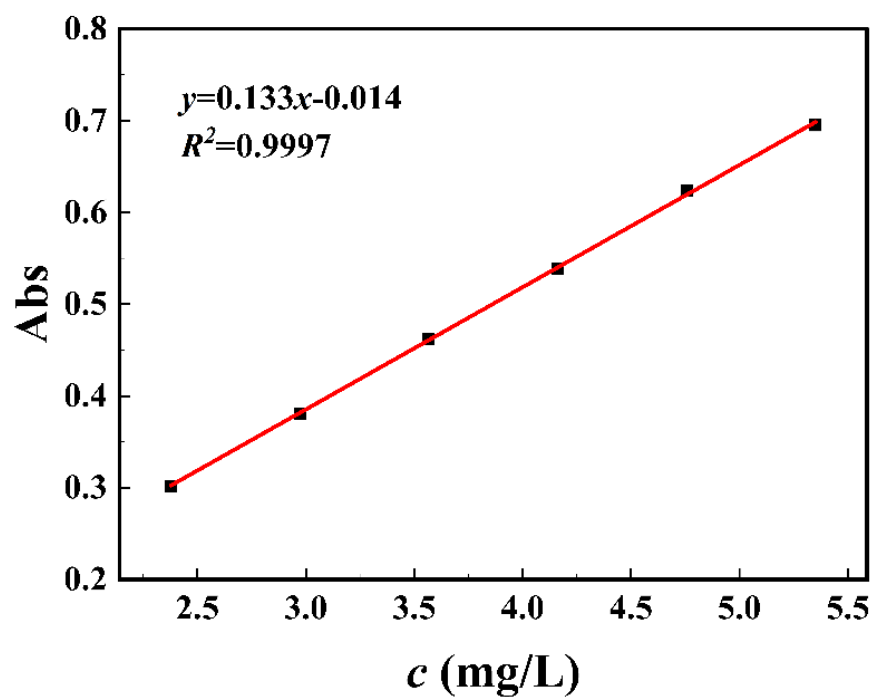

Fig. S6 The standard curve of 5-HMF concentration.

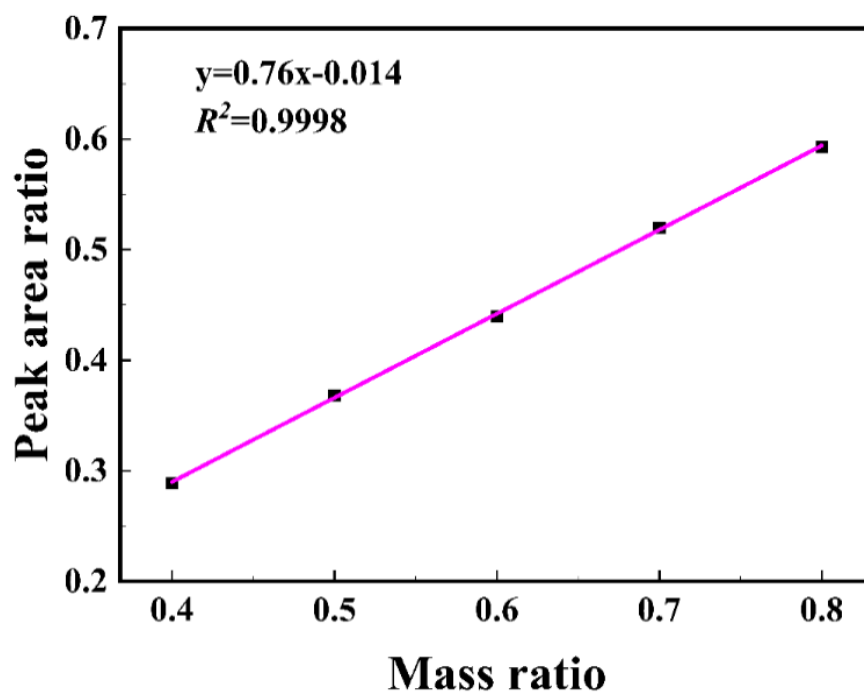

**Fig. S7.** The standard curve of THF concentration.

### 3. Relevant tables

**Table S1.** The reaction conditions for the conversion of fructose to 5-HMF in different solvents reported in the literature.

| Reaction solvent                 | Fructose mass ratio (%) | $T$ (°C) | Yield (%) | $c_{5\text{-HMF}}$ (g/mL) | Ref. |
|----------------------------------|-------------------------|----------|-----------|---------------------------|------|
| Imidazole: benzene sulfonic acid | 10                      | 100      | 90.1      | 0.06                      | 1    |
| ChCl: lactic acid                | 33.3                    | 140      | 87.2      | 0.24                      | 2    |
| ChCl: p-toluene sulfonic acid    | 2.5                     | 80       | 90.7      | 0.02                      | 3    |
| ChCl: Fructose                   | 20                      | 120      | 72        | 0.10                      | 4    |
| ChCl: N, N'-tetramethylurea      | 50                      | 110      | 89        | 0.06                      | 5    |
| ChCl: Phenol                     | 15-20                   | 110      | 67        | 0.07~0.09                 | 6    |
| ChCl: Citric acid                | 5                       | 120      | 91.03     | 0.03                      | 7    |
| ChCl: Fructose                   | 25                      | 100      | 90.3      | 0.12                      | 8    |

**Table S2.** The polarity of the common organic solvents.

| Organic solvents        | Polarity |
|-------------------------|----------|
| Acetone                 | 5.4      |
| Dioxane                 | 4.8      |
| Tetrahydrofuran         | 4.2      |
| Ethyl acetate           | 4.3      |
| Methyl isobutyl ketone  | 4.2      |
| Methylene chloride      | 3.4      |
| Ethyl ether             | 2.9      |
| Toluene                 | 2.4      |
| 2-Methylfuran           | 3.6      |
| 2-Methyltetrahydrofuran | 3.2      |



**Table S3.** The distribution coefficients for the extraction of 5-HMF by different extractants in DESs at 30 °C.

| DES<br>Extractant | ForCC | AceCC | MeAcCC | LACC | MaloCC | OxaCC | MalCC | CitCC |
|-------------------|-------|-------|--------|------|--------|-------|-------|-------|
| Acetone           | 0.52  | 0.22  | 0.77   | 0.37 | 0.65   | 0.48  | 0.86  | 0.76  |
| Dioxane           | 0.46  | 0.21  | 0.67   | 0.36 | 0.53   | 0.47  | 0.84  | 0.54  |
| THF               | 0.77  | 0.39  | 0.86   | 0.59 | 0.75   | 0.69  | 0.87  | 0.84  |
| EtOAc             | 0.41  | 0.18  | 0.62   | 0.34 | 0.32   | 0.42  | 0.51  | 0.52  |
| MIBK              | 0.37  | 0.18  | 0.59   | 0.31 | 0.32   | 0.36  | 0.36  | 0.51  |
| MeCh              | 0.11  | 0.16  | 0.39   | 0.11 | 0.28   | 0.28  | 0.35  | 0.35  |
| Ethyl ether       | 0.12  | 0.16  | 0.37   | 0.12 | 0.22   | 0.16  | 0.31  | 0.31  |
| Toluene           | 0.01  | 0.12  | 0.36   | 0.01 | 0.11   | 0.11  | 0.23  | 0.23  |
| 2-MeF             | 0.32  | 0.16  | 0.46   | 0.39 | 0.39   | 0.56  | 0.41  | 0.41  |
| 2-MeTHF           | 0.33  | 0.16  | 0.56   | 0.38 | 0.42   | 0.42  | 0.43  | 0.43  |

Notes: MeCh is methylene chloride; 2-MeF is 2-methylfuran; 2-MeTHF is 2-methyltetrahydrofuran.

**Table S4.** The distribution coefficients for the extraction of 5-HMF at different temperatures.

| T (°C)<br>DES | 20   | 30   | 40   | 50   | 60   |
|---------------|------|------|------|------|------|
| ForCC         | 0.79 | 0.77 | 0.61 | 0.56 | 0.52 |
| AceCC         | 0.42 | 0.39 | 0.36 | 0.31 | 0.28 |
| MeAcCC        | 0.89 | 0.86 | 0.80 | 0.76 | 0.73 |
| LACC          | 0.63 | 0.59 | 0.55 | 0.53 | 0.51 |
| MaloCC        | 0.77 | 0.75 | 0.70 | 0.67 | 0.64 |
| OxaCC         | 0.70 | 0.69 | 0.67 | 0.60 | 0.56 |
| MalCC         | 0.89 | 0.87 | 0.82 | 0.79 | 0.77 |
| CitCC         | 0.86 | 0.84 | 0.79 | 0.75 | 0.72 |

**Table S5.** The distribution coefficients for the extraction of 5-HMF at different concentrations.

| c (g/mL)<br>DES | 0.02 | 0.04 | 0.06 | 0.08 | 0.10 |
|-----------------|------|------|------|------|------|
| ForCC           | 0.77 | 0.78 | 0.77 | 0.78 | 0.79 |
| AceCC           | 0.37 | 0.37 | 0.37 | 0.39 | 0.38 |
| MeAcCC          | 0.84 | 0.87 | 0.85 | 0.86 | 0.88 |
| LACC            | 0.59 | 0.60 | 0.59 | 0.59 | 0.58 |
| MaloCC          | 0.74 | 0.77 | 0.75 | 0.75 | 0.78 |
| OxaCC           | 0.68 | 0.67 | 0.65 | 0.69 | 0.68 |
| MalCC           | 0.87 | 0.89 | 0.85 | 0.88 | 0.88 |
| CitCC           | 0.86 | 0.84 | 0.85 | 0.85 | 0.84 |

**Table S6.** The distribution coefficients for the extraction of 5-HMF at different times.

| t (min)<br>DES | 5    | 15   | 30   | 45   | 60   |
|----------------|------|------|------|------|------|
| ForCC          | 0.40 | 0.64 | 0.77 | 0.78 | 0.79 |
| AceCC          | 0.23 | 0.26 | 0.39 | 0.39 | 0.38 |
| MeAcCC         | 0.60 | 0.74 | 0.86 | 0.86 | 0.88 |
| LACC           | 0.44 | 0.46 | 0.54 | 0.59 | 0.58 |
| MaloCC         | 0.54 | 0.59 | 0.66 | 0.75 | 0.78 |
| OxaCC          | 0.56 | 0.62 | 0.63 | 0.69 | 0.68 |
| MalCC          | 0.59 | 0.61 | 0.84 | 0.88 | 0.88 |
| CitCC          | 0.56 | 0.61 | 0.74 | 0.85 | 0.84 |

**Table S7.** The distribution coefficients for the extraction of 5-HMF with different inorganic salts.

| Inorganic salt           | No adding | NaCl | K <sub>2</sub> SO <sub>4</sub> | KCl  | Na <sub>2</sub> SO <sub>4</sub> |
|--------------------------|-----------|------|--------------------------------|------|---------------------------------|
| Distribution coefficient | 0.59      | 1.30 | 1.02                           | 1.14 | 1.59                            |

**Table S8.** The distribution coefficients for the extraction of 5-HMF with different concentrations of NaCl solution.

| Concentration (mol/L)    | 0.5  | 1.0  | 1.5  | 2.0  |
|--------------------------|------|------|------|------|
| Distribution coefficient | 1.05 | 1.30 | 1.06 | 1.00 |

## 4. References

1. C. C. Ruan, F. Mo, H. Qin, H. Y. Cheng, L. F. Chen and Z. W. Qi, *ACS Sustain. Chem. Eng.*, 2021, **151**, 445-453.
2. A. R. Mankar, A. Pandey, A. Modak and K. K. Pant, *Rnew. Energ.*, 2021, **177**, 643-651.
3. A. A. Assanosi, M. M. Farah, J. Wood and B. Al-Duri, *RSC Adv.*, 2014, **4**, 39359-39364.
4. F. Liu, J. Barrault, K. D. Vigier and F. Jerome, *ChemSusChem.*, 2012, **5**, 1223-1226.
5. F. Ilgen, D. Ott, D. Kralisch, C. Reil, A. Palmberger and B. Konig, *Green Chem.*, 2009, **11**, 1948-1954.
6. P. H. Tran and P. V. Tran, *Fuel.*, 2019, **246**, 18-23.
7. E. S. Morais, M. G. Freire, C. S. R. Freire and A. J. D. Silvestre, *Int. J. Mol. Sci.*, 2022, **23**, 1959.
8. M. Zuo, K. Le, Z. Li, Y. T. Jiang, X. H. Zeng, X. Tang, Y. Sun and L. Lin, *Ind. Crops Prod.*, 2017, **99**, 1-6.
